# Supplementary material for: YY1 inhibits differentiation and function of regulatory T cells by blocking Foxp3 expression and activity
Source: PubMed Central journal article supplement (PMC4762897; doi:10.1038/ncomms10789), 2016-02-19
Supplement: ncomms10789-s1.pdf [file ncomms10789-s1.pdf]

# Supplementary Figures

**A**

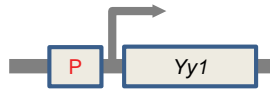

Promoter  
 AAATCTAAGAAACAATAAGATACACTGGCTCAAATTTTCG  
 GTTCTTGAAAAAAGGCAATCTAACTTTATGTTGCTTT  
 AAACCCACCTGGTCTATCGAAAGGACACAGAAAGAAACA  
 CTTCACTACAATGTATCTTAAGCAATTTGATGATTTGAACAAG  
 GAAACCTAAGCTGTACTATAATAGGGAAATCACAAAAGA  
 CATGGAATTTCAAAGAGCTAAATGCAAAGACTATTTAAAAG  
 GAATATTTTAAATAGTCTTTTCGGCAAAGGAAATGTTATG  
 AGCGAGGAATAGCGGAAGC

Foxp3 site-1 (-1498) : AATCTAAGAAACAATAAGATACACT  
 Foxp3 site-2 (-1217) : GCAAAAGGAAATGTTATGAGCGAGGA

**B**

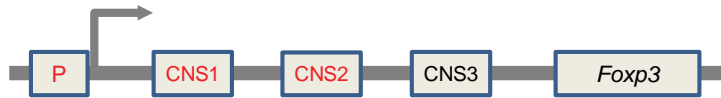

Promoter  
 TCTGGGAGCCAGCCATTCTGAGACTCTGATTCTGTGAATT  
 TGTGGGGGG AGTACAGCCC ACTTTTCTCCATGAATTGCTT  
 ICCATGCCCTTGCCTTCTGTGAAAGAAAGGCTACAGGAGT  
 GGCCAGCTCTGCCAAGCCTTGGCAACATGATGGTGGTATC  
 ATATGC

YBS-1 : GGAGCCAGCCATTCTGAGA  
 YBS-2 : TTTCTCCATGAATTGCTTTCCATGCTC  
 YBS-3 : GGCAACATGATGGTGGTAT

CNS1  
 ATGAGATAACTGTTTCCATGTTGGCTTCCAGTCTCCTTTAT  
 GGCTTCATTTTTCCATTTACTGCAGAGGTCAAAAGTGGGGT  
 ATGGGAGCCAGACTGTCTGGAAACAACCTAGCCTCAACTCAAG  
 TCACTGTGTGAATTTACCCAGGCTCTTAACCTCTCTGTACCT  
 CCATTTCTCGTATGTACTGTGATGAT

YBS-4 : CTGTTCACTCCATGTTGGCTTC  
 YBS-5 : TCCTTTATGGCTTCATTTTTCCATTTACTGCA  
 YBS-6 : TCTGTACTCTCATTCTCGT  
 SBE : GGTATGGGAGCCAGACTGCTGGAACAACCTA

CNS2  
 CCGATGAAGCCCAATGCATCCGGCCGCCATGACGTC AATGGCA  
 GAAAAATCTGGCCAAGTTCAAGTTGTGACAAAC

YBS-7 : ATCCGGCCGCCATGACGTC AATGGCAGAAA

**C**

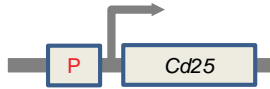

Promoter  
 GCAGGTTTGAACAAAACCTTGGACATGTCTCACAAGCATT  
 TGTCTGAAATGGCTTGAATGTATCCTTGTATATTACAT  
 TCACATATCTCAATGCATCATGGTTGAACACCATATGTGTTA  
 TGAATCAGTGTCTTATTTCAAATAATATTTGATGTAGCCTGT  
 CTCCAGAGCCACAGTGTGATACCTTTATCCTAAGATCCTCA  
 GACTCTTATGAGTTCAAAGTGCCTGTGACACTCCTGTAACAC  
 TCCTGTCTATAATACTACTGATTATGCTGGCGTGCATTTTTC  
 CCTCAAGGGAGGAAATTAAGATTTACCCAGATCTTATTGCA  
 AACAAACAGCTCAGCAACTAGGCTAGAAGTAAAGTTATG  
 TCAATAGTGGTGAAGAGACAGCTTGTGACACTATGAGAG  
 AAGGCAAAAGGTTCTTTCTGAAAGGCTCCTGGGAGCAAGCT  
 AGACTTAAATCTTCCATTGCAGCTGTAACAACATCTGGACA

YBS(-975) :  
 ATGCATCATGGTTGAACACCATATGTGT

**D**

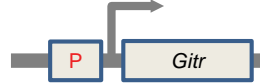

Promoter  
 GAGGAGGAAATGGCAAATAAGAGAAAAGACCTTGGTGGG  
 CAGGTAACCTGAGTTTAGGGGTGTAATCTAGCCAGTCAGA  
 GAGAATGGAAGAGAAAGGCAAGGCTGTGAGGAGGCTGCT  
 GGCCATGTTCAAGAAAATGAGGCTCACCTGTATCTGGGACT  
 CCTTCTTGTGTTCTAAAATTTGTGAGGAAAGTGAACAAAAG  
 TGGCTCCAGGGAGGCCAAGCTGGAAGTCCCAAGGCTAGA  
 CCTGGCCAGGCCACACCCGCTGCTCATGACTTGCCTA  
 GGAATACCTACTTTATGATGATCTTCTAGCGAGGCATGGTG  
 TGTGCTCTGGACTCCTCTCGCTGCTCCTAGTTTCCAG  
 GCTTAGAGGAACTTCTGGGCAAGAGGGGAGGGGGTA  
 GTTTTATACATAAGGGGTGCCACAGGTGCCAGCAGTGGC  
 ACATGTGAATGGCATCTTTTCTCTGTAGCCTAGCCAGG  
 GCGAGTTTGTGAGTTGGGAGGCAATGAGGGTTAGG  
 AGATGTCCAGAAAAGGGGATAGCTCTGCTCTACACTTACAG  
 AAGCCCTTACAACAACCTCAGATGT

YBS (-581) :  
 GTCAGAGCCATGCTGGCCATGTTCAAG

**E**

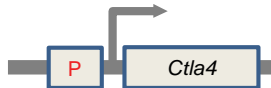

Promoter  
 CAGGACTAAGAGGGATGGCCATGGGACGCTAAGTAAGA  
 GTACTGGGGGATTAAGATGACCAGATGACTGGATAAAG  
 TTGGGACTGGGATTTAGGATTCCTTGTACTACAGAAATT  
 ATACTCTCAAAGACTCCACGCTCCAGGTCCTCAGAGGT  
 GACTCGAAGCTTCAAGTTTCAAGTTGAGTACATTTTCCATC  
 CATGGATTTGCTGTTTGTTCAGTTTAAAGTTGAATATTT  
 GAGGTCGTCTTACGACGTAACAGCTAAACCCACGGCTT  
 CCTTTCTCGTAAACCAAAACAAGGCTCTCTGTTTACG  
 GTGCTCTGTGTGTCAC

YBS(-318) : AAGAGGGATGGCCATGGGACGCT

**Supplementary Figure 1. Sequences in the regulatory elements of the *Yy1*, *Foxp3*, *Cd25*, *Gitr*, and *Ctla4* genes**

**(A-E)** DNA Sequences in the regulatory elements of the *Yy1* **(A)**, *Foxp3* **(B)**, *Cd25* **(C)**, *Gitr* **(D)**, and *Ctla4* **(E)** genes. Oligomers used in EMSA were as indicated. Red characters mean putative YY1 binding sites. Blue characters indicate putative Foxp3 binding sites. Green characters indicate Smad-binding elements. P, promoter; CNS, conserved non-coding sequence.

A

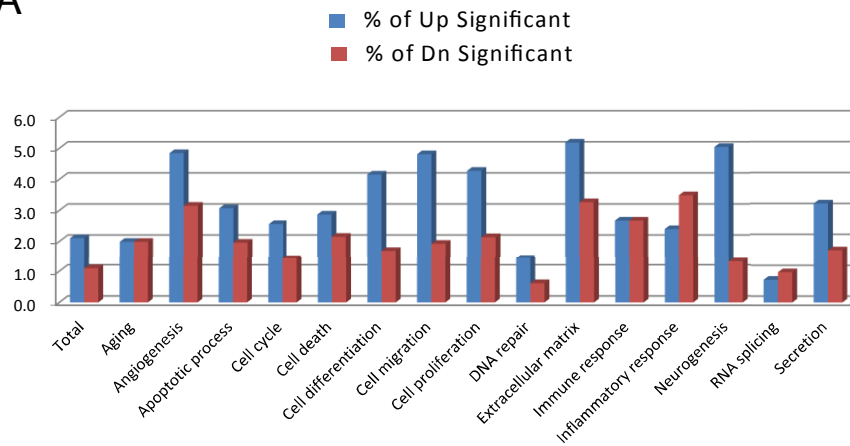

B

| gene     | YY1/cont |
|----------|----------|
| Tgfb1    | 1.492    |
| Gimap5   | 1.316    |
| H2-M3    | 1.240    |
| Il2rg    | 0.980    |
| Tnfrsf4  | 0.954    |
| Irf1     | 0.908    |
| Icos     | 0.870    |
| Ctla4    | 0.817    |
| Rltpr    | 0.722    |
| Il2ra    | 0.687    |
| Rltpr    | 0.685    |
| Foxp3    | 0.664    |
| Ctla2a   | 0.614    |
| Tnfrsf18 | 0.606    |
| Tnfsf4   | 0.495    |

**Supplementary Figure 2. Microarray analysis of gene expression by YY1 overexpression in T<sub>reg</sub> cells**

A. Genes upregulated or downregulated more than two fold by YY1 overexpression were categorized by their cellular function. B. Differentially expressed genes by YY1 in a category of Treg cell differentiation.

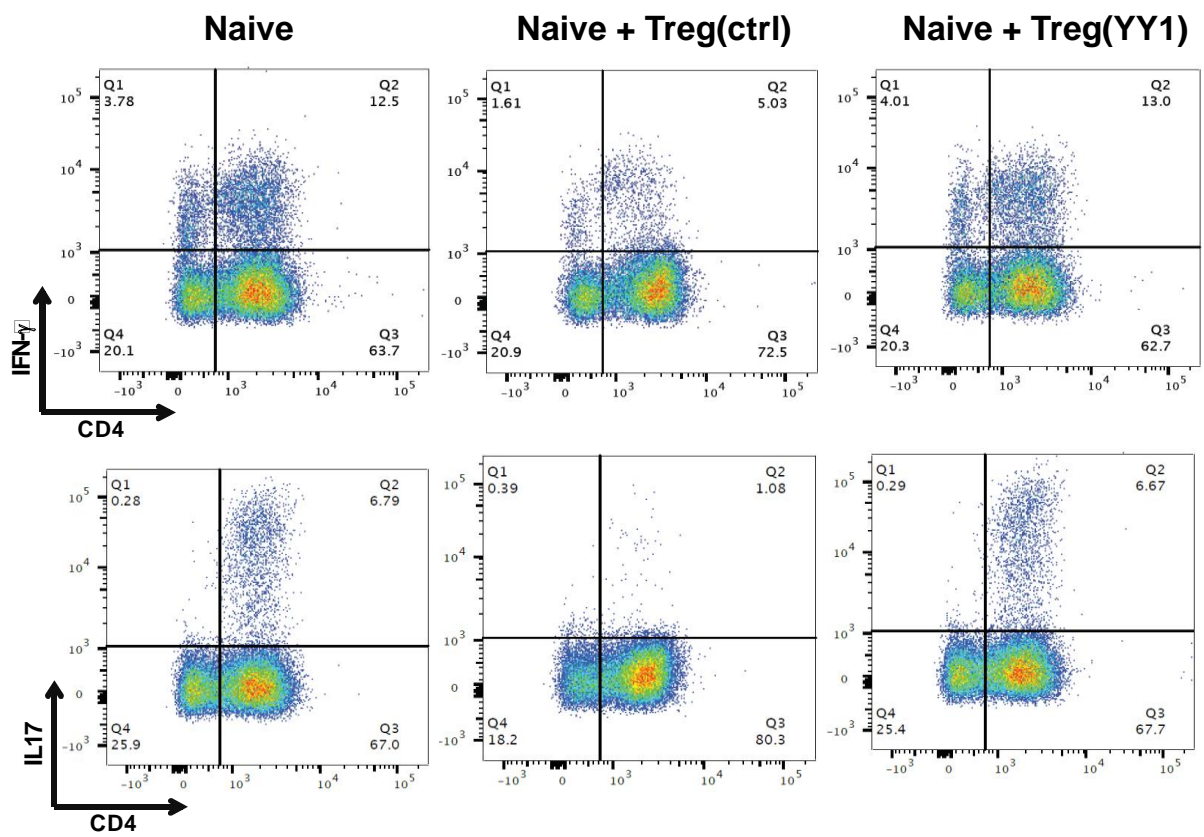

**Supplementary Figure 3. YY1 impairs immunosuppressive function of T<sub>reg</sub> cells *in vivo***

FACS plot of Figure 4F.

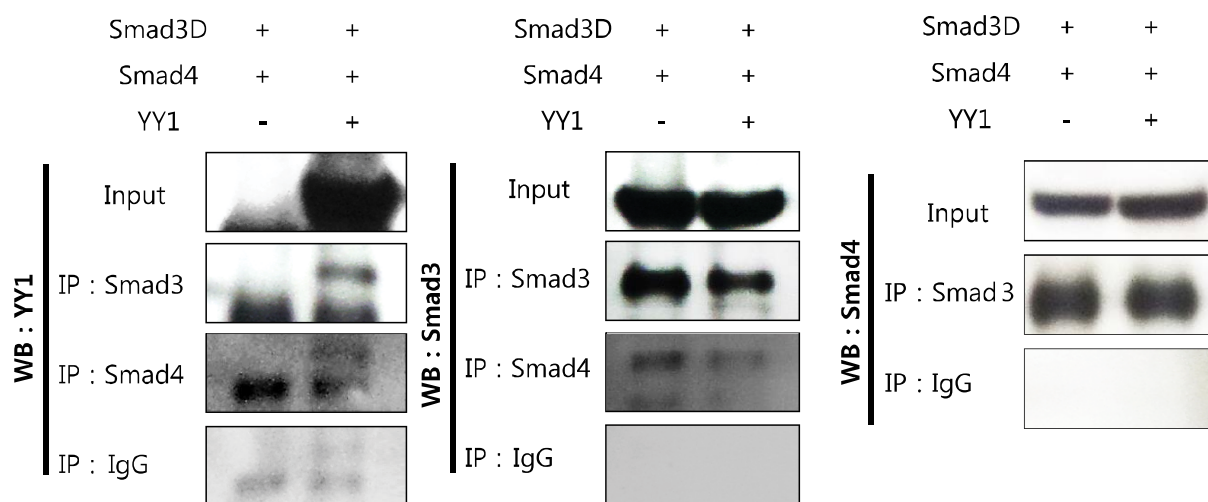

**Supplementary Figure 4. YY1 does not interfere with the dimerization and translocation to the nucleus of Smad3/4**

HEK293T cells were transfected with a *Smad3*-, *Smad4*-, or *Yy1*-expression vector. Cell lysates were immunoprecipitated with an anti-Smad3, anti-Smad4, or control IgG antibody. Then, proteins were immunoblotted by an anti-Smad3, anti-Smad4, or anti-YY1 antibody as indicated.

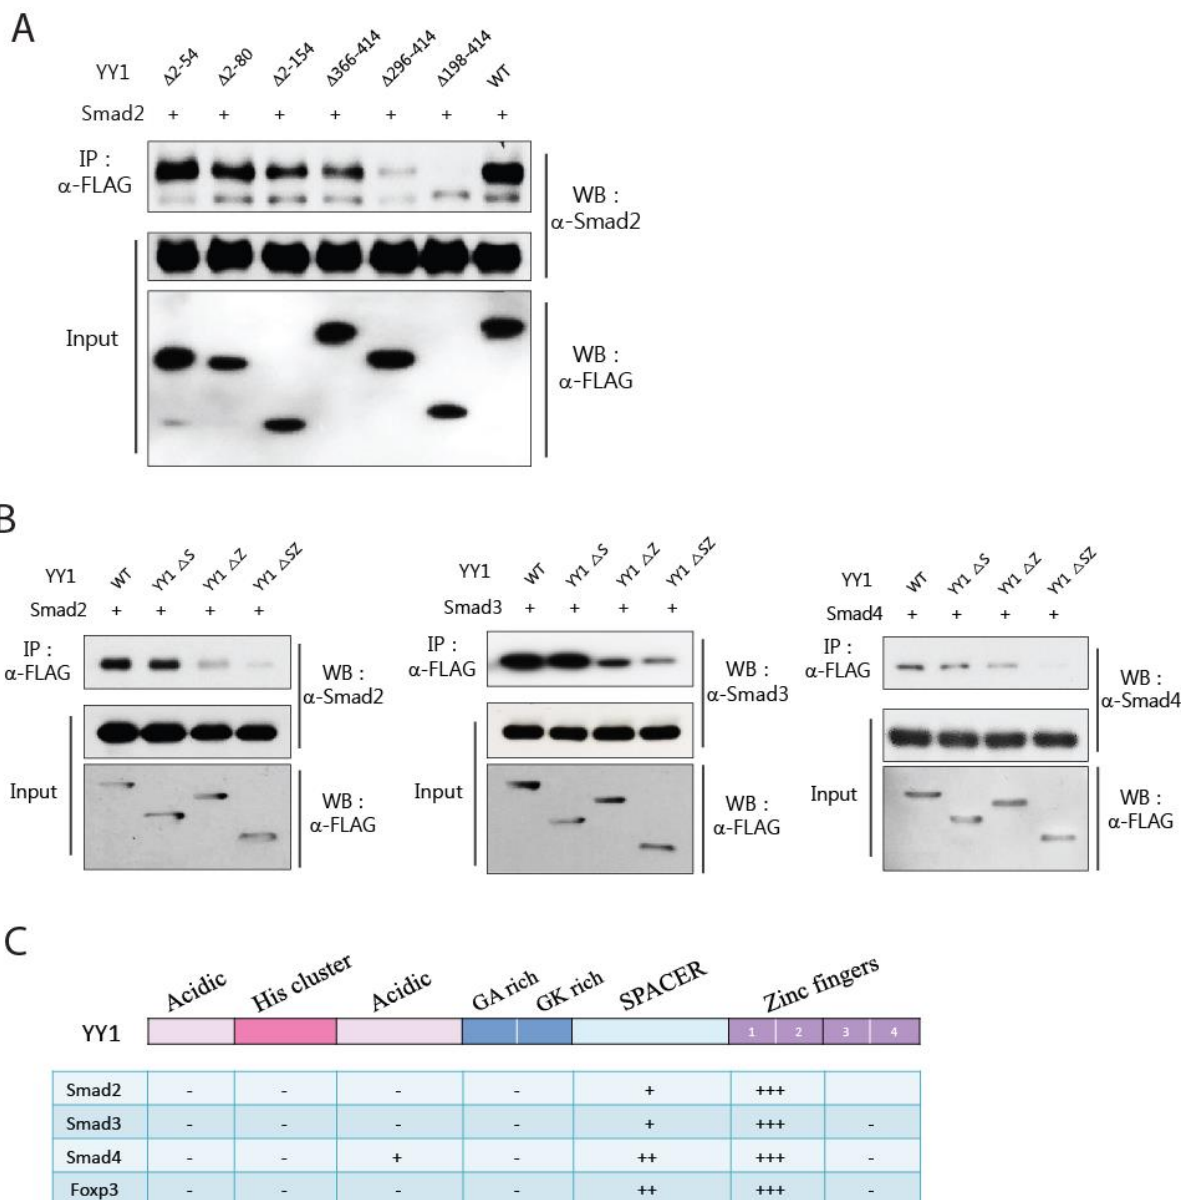

**Supplementary Figure 5. Spacer and zinc finger domains of YY1 are essential for interactions with Smad and Foxp3**

**(A-B)** HEK293T cells were transfected with a *Smad2*- and various FLAG-tagged, *Yy1* domain mutants-expression vectors. Cell lysates were immunoprecipitated with an anti-FLAG antibody. Then, the proteins were immunoblotted by an anti-Smad2 **(A)** and **(B)**, anti-Smad3 **(B)**, anti-Smad4 **(B)**, or anti-FLAG antibody as indicated. **(C)** Summary of YY1 domain binding affinity.

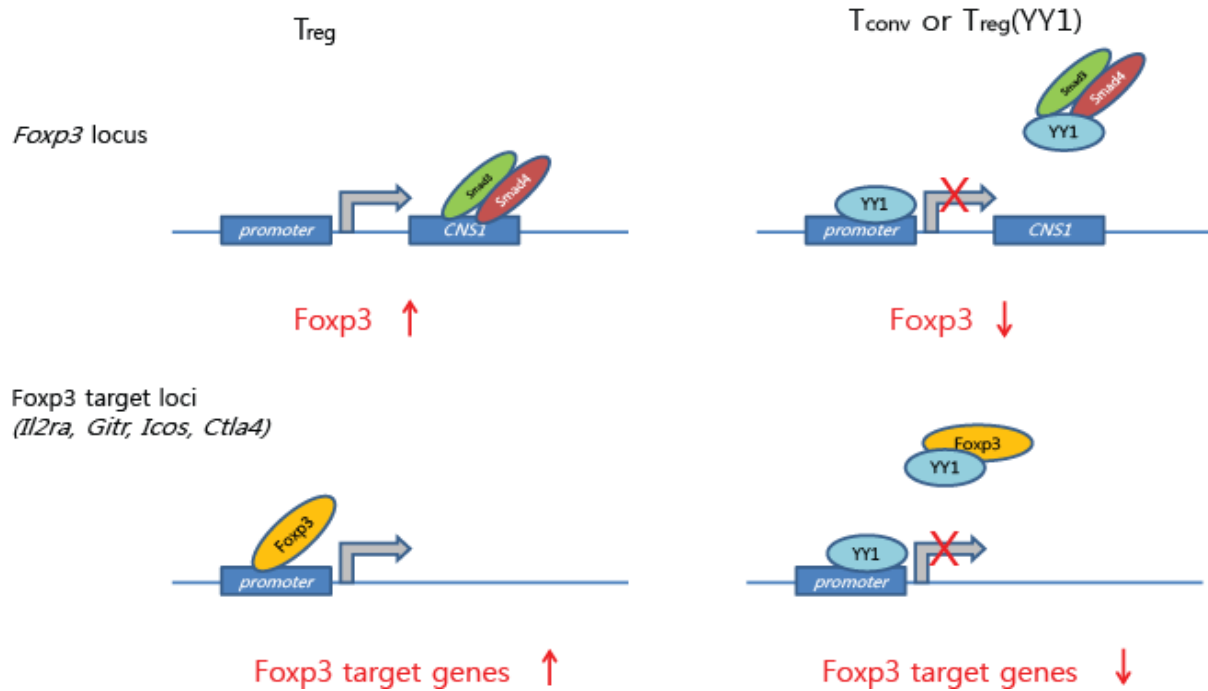

**Supplementary Figure 6. A model for the YY1-mediated inhibition of  $T_{reg}$  differentiation**

Proposed mechanisms for YY1-mediated inhibition of  $T_{reg}$  differentiation and function. First, YY1 inhibits expression of the *Foxp3* gene by binding directly to the *Foxp3* locus and by blocking Smad3/4 binding to the *Foxp3* CNS1 in  $T_{conv}$  or YY1-overexpressing  $T_{reg}$  cells. Second, YY1 inhibits the expression of the *Foxp3*-target genes by blocking *Foxp3* binding to its target genes and by competing with *Foxp3* for binding to the promoters of the genes.

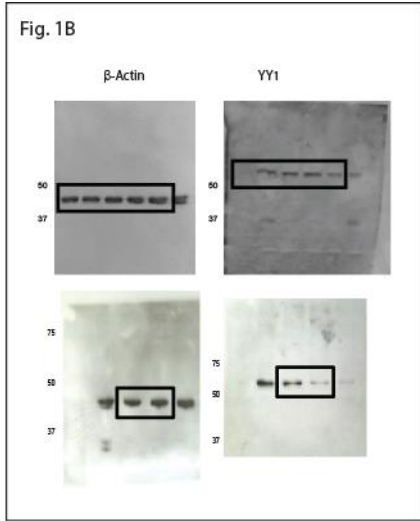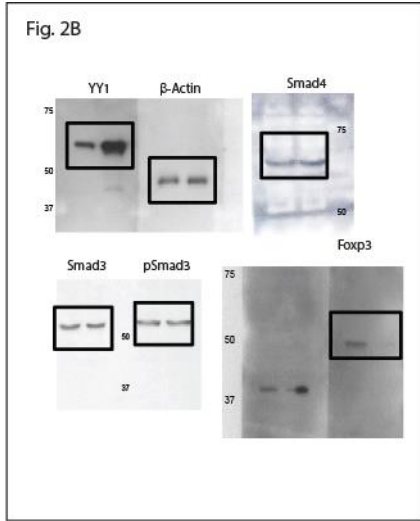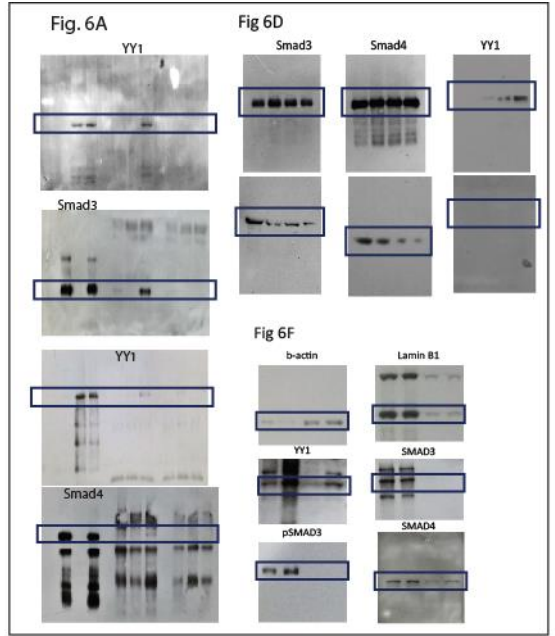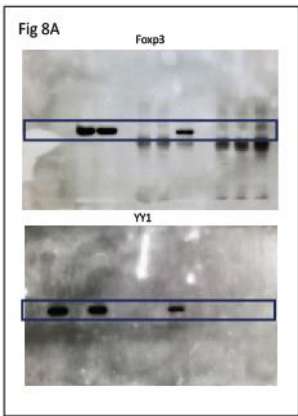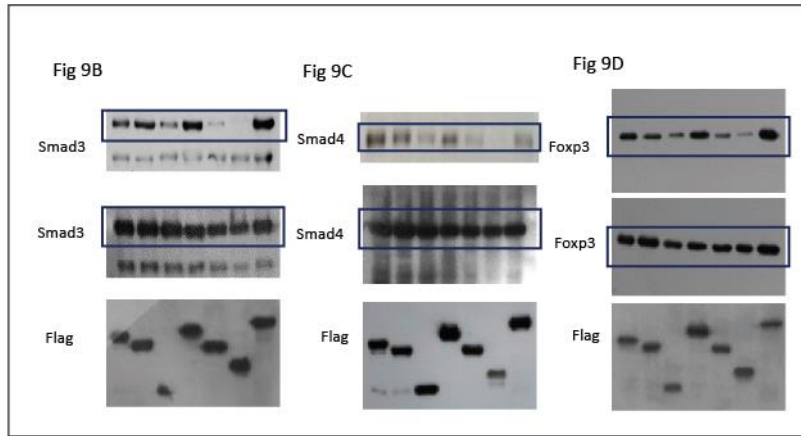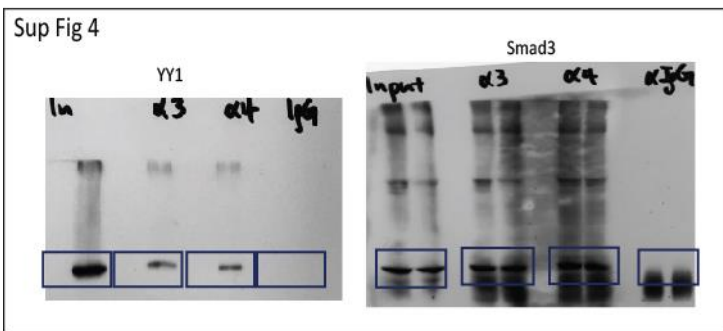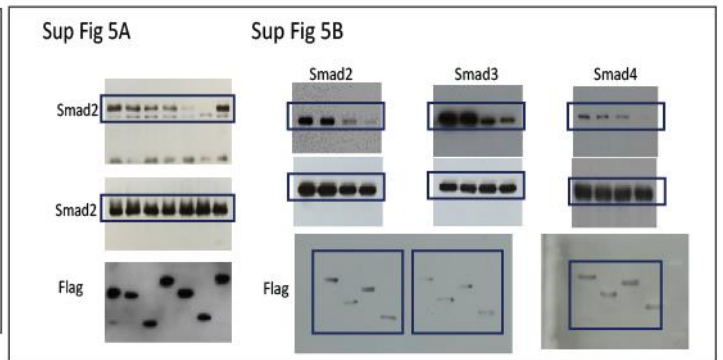

**Supplementary Figure 7. Uncropped western blots of Figure 1, 2, 6, 8, 9, and Supplementary Fig. 4 and 5.**



## Supplementary Tables

**Supplementary Table 1. Oligonucleotides used in EMSA**

| <b>Primer name</b>    | <b>Sequences (5'→3')</b>          |
|-----------------------|-----------------------------------|
| YY1 consensus F       | CGCTCCCCGGCCATCTTGGCGGCTGGT       |
| YY1 consensus R       | ACCAGCCGCCAAGATGGCCGGGGAGCG       |
| Foxp3 CNS1 SBE F      | GGTATGGGAGCCAGACTGTCTGGAACAACCTA  |
| Foxp3 CNS1 SBE R      | TAGGTTGTTCCAGACAGTCTGGCTCCCATACC  |
| Forkhead consensus F  | AAGCGGTAAACAATGAATAACAACGCGAT     |
| Forkhead consensus R  | ATCGCGTTGTTTATTTCATTGTTTACCGCTT   |
| Foxp3 CNS1-YBS1 F     | CTGTTACCCCCATGTTGGCTTC            |
| Foxp3 CNS1-YBS1 R     | GAAGCCAACATGGGGTGAACAG            |
| Foxp3 CNS1-YBS2 F     | TCCTTTATGGCTTCATTTTTTCCATTTACTGCA |
| Foxp3 CNS1-YBS2 R     | TGCAGTAAATGGAAAAATGAAGCCATAAAGGA  |
| Foxp3 CNS1-YBS3 F     | TCTGTACCTCCATTTCTCGT              |
| Foxp3 CNS1-YBS3 R     | ACGAGGAAATGGAGGTACAGA             |
| Foxp3 CNS2-YBS F      | ATCCGGCCGCCATGACGTCAATGGCAGAAA    |
| Foxp3 CNS2-YBS R      | TTTCTGCCATTGACGTCATGGCGGCCGGAT    |
| Foxp3 promoter-YBS1 F | GGAGCCAGCCATTCTGAGA               |
| Foxp3 promoter-YBS1 R | TCTCAGAATGGCTGGCTCC               |
| Foxp3 promoter-YBS2 F | TTTTCTCCATGAATTGCTTTCCATGCCTC     |
| Foxp3 promoter-YBS2 R | GAGGCATGGAAAGCAATTCATGGAGAAAA     |
| Foxp3 promoter-YBS3 F | GGCAACATGATGGTGGTGAT              |
| Foxp3 promoter-YBS3 R | ATCACCACCATCATGTTGCC              |
| CD25 promoter-YBS F   | ATGCATCATGGTTGAACACCCATATGTGT     |
| CD25 promoter-YBS R   | ACACATATGGGTGTTCAACCATGATGCAT     |
| Gitr promoter-YBS F   | GTCAGAGCCATGCTGGCCATGTTCAAG       |
| Gitr promoter-YBS R   | CTTGAACATGGCCAGCATGGCTCTGAC       |
| Ctla4 promoter-YBS F  | AAGAGGGATGGCCATGGGACGCT           |
| Ctla4 promoter-YBS R  | AGCGTCCCATGGCCATCCCTCTT           |

## Supplementary Table 2. Primers used in ChIP assay

| <b>Primer name</b> | <b>Sequences (5'→3')</b>    |
|--------------------|-----------------------------|
| Foxp3 Promoter F   | ATCCTCCAACGTCTCACAAACACA    |
| Foxp3 Promoter R   | TAACAGGGCTCATGAGAAACCACA    |
| Foxp3 CNS1 F       | CAGAGGTCAAAAGTGTGGGTATG     |
| Foxp3 CNS1 R       | ACTTGAGTTGAGGCTAGGTTGTTC    |
| Foxp3 CNS2 F       | CACATCCGCTAGCACCCACATCA     |
| Foxp3 CNS2 R       | TCATCGGCAACAAGGAGGAAGAGA    |
| Foxp3 CNS3 F       | GGGGCCCACACCTCTTCTTCCTT     |
| Foxp3 CNS3 R       | CCCCCGCCACATGCCACAGTAA      |
| YY1 promoter F     | TCAAAGAGCTAAATGCAAAGACTA    |
| YY1 promoter R     | ATTCCTCGCTCATAAACATTCC      |
| CD25 promoter F    | AGACAGCTTGGTGACACTATGAGAG   |
| CD25 promoter R    | GTGTTTACAGCTGCAATGGAAGA     |
| Gitr promoter F    | GGGGCAGAAGGGGGAAGG          |
| Gitr promoter R    | TGGCTAGGCTACAGAGGAAAAGGAT   |
| Icos promoter F    | CTATTTCAAAGGCCTTACATCTCTG   |
| Icos promoter R    | ATATCAATAGCTACTGGGGACTGC    |
| Ctla4 promoter F   | GGGGGATTAAAGATGACCAGATG     |
| Ctla4 promoter R   | AAGACGACCTCAAATATTCAAATAAAA |
| β-globin F         | AGATTTTTCCACTCCCTATTC       |
| β-globin R         | TGGCTGTAAGAAACCTAAATTAG     |

**Supplementary Table 3. Primers used in qRT-PCR**

| <b>Primer name</b> | <b>Sequences (5'→3')</b>                |
|--------------------|-----------------------------------------|
| Yy1 F              | CAGTGGTTGAAGAGCAGATCAT                  |
| Yy1 R              | AGGGAGTTTCTTGCCTGTCAT                   |
| Hprt F             | FCTGGTGAAAAGGACCTCTCG                   |
| Hprt Probe         | FAM-TGTTGGATACAGGCCAGACTTTGTTGGAT-TAMRA |
| Hprt R             | TGAAGTACTCATTATAGTCAAGGGCA              |
| Foxp3 F            | GGCCCTTCTCCAGGACAGA                     |
| Foxp3 Probe        | FAM-ACTTCATGCATCAGCTCTCCACTGTGGAT-TAMRA |
| Foxp3 R            | GCTGATCATGGCTGGGTTGT                    |
| CD25 F             | AACCATAGTACCCAGTTGTCCG                  |
| CD25 R             | TCCTAAGCAACGCATATAGACCA                 |
| Ctla4 F            | CAGGTGACCCAACCTTCAGT                    |
| Ctla4 R            | CAGTCCTTGGATGGTGAGGT                    |
| Girt F             | CGCGGGGAGCAGACAGAAGAA                   |
| Girt R             | GGCCCAAAGACCCTACTCCAACAG                |
| Icos F             | TGACCCACCTCCTTTTCAAG                    |
| Icos R             | TTAGGGTCATGCACACTGGA                    |
| Il10 F             | GGTTGCCAAGCCTTATCGGA                    |
| Il10 R             | ACCTGCTCCACTGCCTTGCT                    |
